# Supplementary material
Source: Springer Nature journal article supplement (https://www.springermedizin.de/resource/supplementary/12891_2010_1165_MOESM8_ESM.pdf/9507214)

**Std. Mean Difference**

**Study or Subgroup**

**IV, Fixed, 95% CI**

|               |                      |
|---------------|----------------------|
| Eversden 2007 | -0.10 [-0.53, 0.33]  |
| Foley 2003    | 0.05 [-0.42, 0.52]   |
| Fransen 2007  | 0.25 [-0.13, 0.62]   |
| Gill 2009     | -0.12 [-0.60, 0.36]  |
| Silva 2008    | 0.05 [-0.44, 0.54]   |
| Suomi 2003    | -1.43 [-2.43, -0.42] |
| Wyatt 2001    | 0.43 [-0.19, 1.04]   |

**Total (95% CI)**                      **0.04 [-0.15, 0.24]**

Heterogeneity:  $\text{Chi}^2 = 2.03$ ,  $\text{df} = 4$  ( $P = 0.73$ );  $I^2 = 0\%$

Test for overall effect:  $Z = 0.44$  ( $P = 0.66$ )

**Std. Mean Difference**

**IV, Fixed, 95% CI**

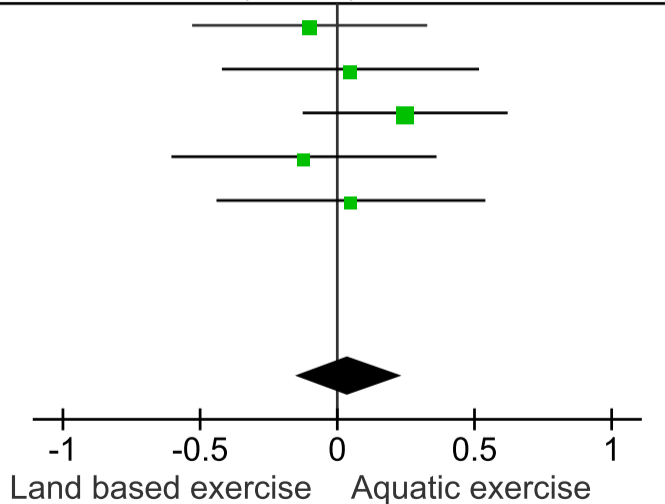

Supplement: MOESM8 [file 9507214]
